# Supplementary material for: Elicitation of Expert Prior Opinion: Application to the MYPAN Trial in Childhood Polyarteritis Nodosa
Source: PubMed Central journal article supplement (PMC4378846; doi:10.1371/journal.pone.0120981), 2015-03-30

**S1 File:** Structured questionnaire designed to systematically ascertain prior opinion regarding outcomes for treatment with CYC and MMF

NAME:

Before any data are observed, please answer the following questions to specify your prior distributions.

Mark on the scales below your answers to the following questions (to the nearest 0.05).

**Q1:** What do you think the 6-month remission rate for children with PAN treated with cyclophosphamide (CYC) in combination with corticosteroids (steroids) is?

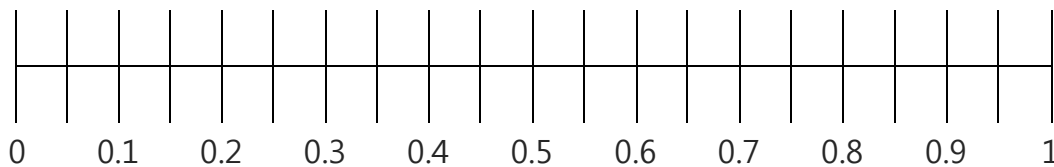

**Q2:** Provide a proportion such that you are 75% sure that the true 6-month remission rate on CYC/steroids exceeds this value.

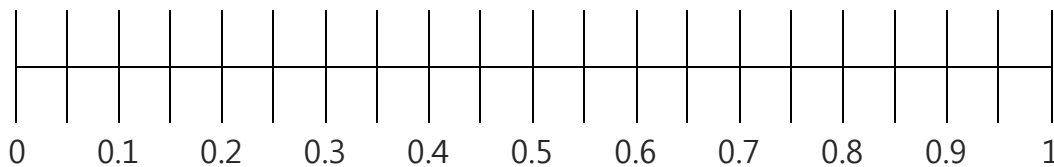

Because of the unpleasant side-effects of CYC, mycophenolate mofetil (MMF) might be considered the preferable treatment even if it is associated with a somewhat lower 6-month remission rate:

**Q3:** What is the chance that the 6-month remission rate on MMF/steroids is higher than that on CYC/steroids?

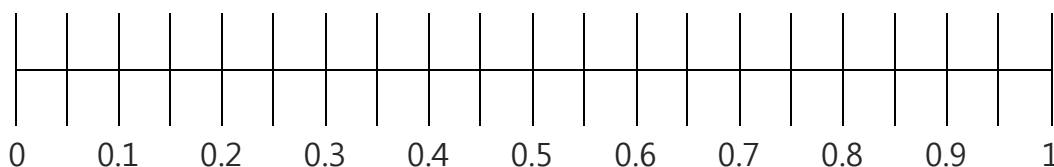

**Q4:** What is the chance that the 6-month remission rate on CYC/steroids exceeds that on MMF/steroids by more than 10%?

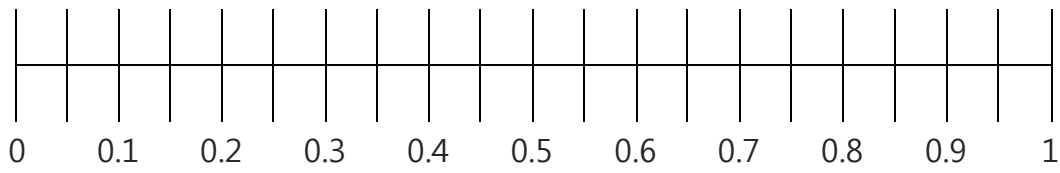

Please answer the following questions which will allow us to check the adequacy of your fitted prior distributions.

**Q5:** What do you think the 6-month remission rate on MMF/steroids is?

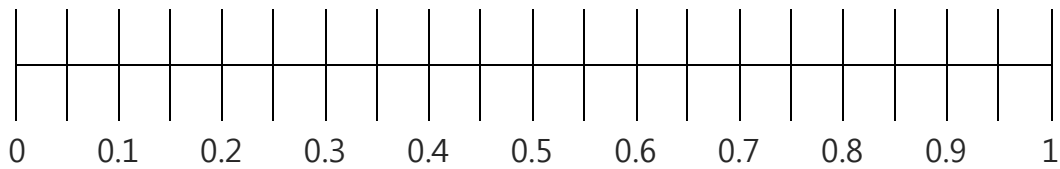

**Q6:** Provide a proportion such that you are 75% sure that the true 6-month remission rate on MMF/steroids exceeds this value.

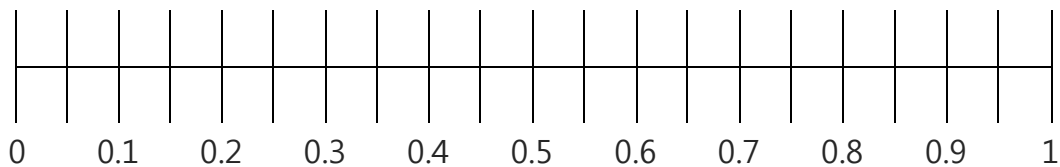

Supplement: pone.0120981.s001.pdf [file pone.0120981.s001.pdf]
