# Supplementary material for: Elicitation of Expert Prior Opinion: Application to the MYPAN Trial in Childhood Polyarteritis Nodosa
Source: PubMed Central journal article supplement (PMC4378846; doi:10.1371/journal.pone.0120981), 2015-03-30
Supplement: pone.0120981.s003.pdf [file pone.0120981.s003.pdf]

**S1 Table:** Individual experts' final answers to Q1-Q4 and consensus answers agreed by the group before results from the MYCYC trial were revealed

| <b>Expert</b>                       | <b>Q1</b>   | <b>Q2</b>   | <b>Q3</b>   | <b>Q4</b>   |
|-------------------------------------|-------------|-------------|-------------|-------------|
| 1                                   | 0.65        | 0.45        | 0.63        | 0.05        |
| 2                                   | 0.85        | 0.60        | 0.35        | 0.20        |
| 3                                   | 0.80        | 0.55        | 0.10        | 0.50        |
| 4                                   | 0.85        | 0.65        | 0.20        | 0.40        |
| 5                                   | 0.70        | 0.60        | 0.20        | 0.20        |
| 6                                   | 0.80        | 0.80        | 0.15        | 0.10        |
| 7                                   | 0.75        | 0.50        | 0.10        | 0.15        |
| 8                                   | 0.75        | 0.55        | 0.30        | 0.20        |
| 9                                   | 0.70        | 0.60        | 0.20        | 0.10        |
| 10                                  | 0.70        | 0.60        | 0.25        | 0.25        |
| 11                                  | 0.75        | 0.55        | 0.30        | 0.20        |
| 12                                  | 0.70        | 0.50        | 0.10        | 0.30        |
| 13                                  | 0.75        | 0.40        | 0.20        | 0.15        |
| 14                                  | 0.80        | 0.55        | 0.20        | 0.35        |
| 15                                  | 0.80        | 0.60        | 0.20        | 0.30        |
| <b>Mean</b>                         | <b>0.76</b> | <b>0.57</b> | <b>0.23</b> | <b>0.23</b> |
| <b>Median</b>                       | <b>0.75</b> | <b>0.55</b> | <b>0.20</b> | <b>0.20</b> |
| <b>Consensus values<sup>†</sup></b> | <b>0.70</b> | <b>0.50</b> | <b>0.30</b> | <b>0.30</b> |

**Q1:** What do you think the 6-month remission rate for children with PAN treated with cyclophosphamide (CYC) in combination with corticosteroids (steroids) is?

**Q2:** Provide a proportion such that you are 75% sure that the true 6-month remission rate on CYC/steroids exceeds this value.

**Q3:** What is the chance that the 6-month remission rate on MMF/steroids is higher than that on CYC/steroids?

**Q4:** What is the chance that the 6-month remission rate on CYC/steroids exceeds that on MMF/steroids by more than 10%?

<sup>†</sup> Consensus answers to questions were determined by vote. Experts voted for the pair of answers to (Q1, Q2) which they thought best reflected their prior opinion for  $p_C$ . Votes were cast between pairs of answers (0.7, 0.5) and (0.75, 0.55), which received 10 (67%) and 4 (27%) votes, respectively; one expert abstained. Consensus answers were those voted for by the majority as reflecting their opinion. Consensus answers to (Q3, Q4) were determined by a similar process, with experts casting votes between the following pairs of answers: (0.3, 0.3) and (0.3, 0.35) which received 12 (80%) and 3 (20%) votes, respectively.
