# Supplementary material for: Elicitation of Expert Prior Opinion: Application to the MYPAN Trial in Childhood Polyarteritis Nodosa
Source: PubMed Central journal article supplement (PMC4378846; doi:10.1371/journal.pone.0120981), 2015-03-30
Supplement: pone.0120981.s004.pdf [file pone.0120981.s004.pdf]

**S2 Table:** Clinical trials in adults with polyarteritis nodosa

| Study                                                | Study population                                          | Trial design                                                                                                                   | Years to recruit | Outcome                                                                                                                                                                                                                    | Adverse events                                                                                               | Conclusion                                                                                                                                  |
|------------------------------------------------------|-----------------------------------------------------------|--------------------------------------------------------------------------------------------------------------------------------|------------------|----------------------------------------------------------------------------------------------------------------------------------------------------------------------------------------------------------------------------|--------------------------------------------------------------------------------------------------------------|---------------------------------------------------------------------------------------------------------------------------------------------|
| <b>Ribi et al 2010 (A&amp;R 62:1186-1197)</b>        | 124 adults with PAN (n=58) or MPA (n=66) with FFS=0       | Open-label RCT: 39 patients who failed corticosteroids randomised to receive CYC or AZA. Corticosteroids given to both groups. | 12               | <u>Remission:</u> 69% CYC<br>70% AZA<br><u>Death:</u> 20%<br>32% CYC<br>10% AZA                                                                                                                                            | 54% : equal in CYC or AZA                                                                                    | AZA or CYC reasonably effective for treating mild but corticosteroid resistant PAN/MPA                                                      |
| <b>Guillevin et al 2003 (A&amp;R 49: 93-100)</b>     | 65 adults with PAN (n=18) or MPA (n=47) with FFS $\geq$ 1 | Open-label RCT of 6 vs 12 intravenous doses of CYC. Corticosteroids given to both groups. AZA not given on cessation of CYC.   | 6                | <u>Remission:</u> 86%<br><u>Relapses:</u> 22% for 12 CYC<br>66% for 6 CYC<br><u>Death:</u> 22%<br>18% for 12 CYC<br>26% for 6 CYC                                                                                          | 100% had nausea/vomiting<br>51% had other side effects                                                       | 6 CYC pulses are less effective than 12 CYC pulses to treat severe PAN and MPA                                                              |
| <b>Gayraud et al 1997 (Br J Rheum 36: 1290-1297)</b> | 25 adults with PAN (n=17) or CSS (n=8) with FFS=0         | Open-label RCT of daily oral CYC vs monthly-IV CYC                                                                             | 4                | <u>Remission:</u> 76%<br>no difference between oral or IV CYC. Higher cumulative CYC dose in oral group<br><u>Relapses:</u> 16%<br>similar in both groups<br><u>Death:</u> 4%<br>1 patient in IV CYC group died of sepsis. | 72%<br><u>Oral CYC:</u> 27 side effects in 10/12 patients<br><u>IV CYC:</u> 14 side-effects in 8/13 patients | IV CYC recommended rather than oral CYC based on more favourable therapeutic index: overall lower cumulative dose with comparable efficacy. |
| <b>Guillevin et al 1995 (A&amp;R 38:1638-1645)</b>   | 62 adults with PAN (n=48) or CSS (n=14) with FFS $\geq$ 1 | Non-blinded RCT of CS-CYC (n=28) versus CS-CYC plus plasma exchange (n=34)                                                     | 5                | <u>Remission:</u> 61%<br>no difference +/- plasma exchange.<br><u>Death:</u> 18%<br>25% without plasma exchange<br>12% with plasma exchange (NS).                                                                          | Infection: 15%<br>Lymphoma: 1 patient                                                                        | Additional plasma exchange is not superior to treatment with CS-CYC alone.                                                                  |

PAN: polyarteritis nodosa; MPA: microscopic polyangiitis; FFS: 5 factor score; RCT: randomised controlled trial; CYC: cyclophosphamide; AZA: azathioprine; CSS: Churg Strauss syndrome; CS: corticosteroid; NS: non-significant.
