# Supplementary material for: Elicitation of Expert Prior Opinion: Application to the MYPAN Trial in Childhood Polyarteritis Nodosa
Source: PubMed Central journal article supplement (PMC4378846; doi:10.1371/journal.pone.0120981), 2015-03-30
Supplement: pone.0120981.s005.pdf [file pone.0120981.s005.pdf]

**S3 Table:** Individual experts' final answers to four questions eliciting their beliefs about the relevance of the MYCYC trial results for informing opinion about 6-month remission rates in the MYPAN trial. Individual and consensus answers were reached after a summary of the design of MYCYC was provided, but before the actual MYCYC results were revealed.

| <b>Expert</b>                       | <b>Q1</b>   | <b>Q2</b>   | <b>Q3</b>   | <b>Q4</b>   |
|-------------------------------------|-------------|-------------|-------------|-------------|
| 1                                   | 0.60        | 0.50        | 0.65        | 0.60        |
| 2                                   | 0.50        | 0.20        | 0.50        | 0.20        |
| 3                                   | 0.55        | 0.40        | 0.50        | 0.50        |
| 4                                   | 0.65        | 0.20        | 0.35        | 0.15        |
| 5                                   | 0.50        | 0.20        | 0.40        | 0.60        |
| 6                                   | 0.50        | 0.50        | 0.50        | 0.50        |
| 7                                   | 0.55        | 0.40        | 0.55        | 0.40        |
| 8                                   | 0.60        | 0.10        | 0.60        | 0.10        |
| 9                                   | 0.50        | 0.30        | 0.30        | 0.20        |
| 10                                  | 0.50        | 0.20        | 0.50        | 0.20        |
| 11                                  | 0.50        | 0.50        | 0.50        | 0.50        |
| 12                                  | 0.70        | 0.20        | 0.60        | 0.10        |
| 13                                  | 0.50        | 0.30        | 0.30        | 0.40        |
| 14                                  | 0.60        | 0.25        | 0.25        | 0.25        |
| 15                                  | 0.60        | 0.20        | 0.60        | 0.20        |
| <b>Mean</b>                         | <b>0.56</b> | <b>0.30</b> | <b>0.47</b> | <b>0.33</b> |
| <b>Median</b>                       | <b>0.55</b> | <b>0.25</b> | <b>0.50</b> | <b>0.25</b> |
| <b>Consensus values<sup>†</sup></b> | <b>0.55</b> | <b>0.25</b> | <b>0.5</b>  | <b>0.25</b> |

**Q1:** What is the chance that the 6-month remission rate on CYC/steroids in the MYCYC patient group exceeds that in the MYPAN patient group?

**Q2:** What is the chance that the 6-month remission rate on CYC/steroids in the MYPAN patient group exceeds that in the MYCYC patient group by more than 10%?

**Q3:** As Q1 above but concerning MMF/steroids instead of CYC/steroids.

**Q4:** As Q2 above but concerning MMF/steroids instead of CYC/steroids.

<sup>†</sup>Once individuals had finalised their answers to Q1-Q4, median values were calculated and it was proposed that these be taken forward as a working summary of the group's consensus opinion. Once the MYCYC data were revealed, median values of answers to Q1-Q4 were used to incorporate these data into the prior distributions for  $\theta$ ,  $p_C$  and  $p_E$  based on expert opinion alone. Through constructive discussions, experts then reached the consensus that densities incorporating MYCYC data had face validity for representing their beliefs (93% agreement; no abstentions permitted).
